# Reproductive factors, menopausal hormone therapies and primary liver cancer risk: a systematic review and dose–response meta-analysis of observational studies

Guo-Chao Zhong<sup>1,†</sup>, Yan Liu<sup>1,2,†</sup>, Nan Chen<sup>1</sup>, Fa-Bao Hao<sup>3</sup>, Kang Wang<sup>4</sup>, Jia-Hao Cheng<sup>5</sup>, Jian-Ping Gong<sup>1</sup>, and Xiong Ding<sup>1,\*</sup>

<sup>1</sup>Department of Hepatobiliary Surgery, The Second Affiliated Hospital of Chongqing Medical University, 74 Linjiang Road, Yuzhong District, Chongqing 400010, China <sup>2</sup>Department of Gastroenterology, The Fifth People's Hospital of Chengdu, 33 Mashi Street, Wenjiang District, Chengdu 611130, China <sup>3</sup>Department of Pediatric Surgery, Children's Hospital of Chongqing Medical University, 136 Zhongshan 2nd Road, Yuzhong District, Chongqing 400014, China <sup>4</sup>Department of Endocrine and Breast Surgery, The First Affiliated Hospital of Chongqing Medical University, 1 Youyi Road, Yuanjiagang District, Chongqing 400016, China <sup>5</sup>Department of Urinary Surgery, The Second Affiliated Hospital of Chongqing Medical University, 74 Linjiang Road, Yuzhong District, Chongqing 400010, China

\*Correspondence address. Department of Hepatobiliary Surgery, The Second Affiliated Hospital of Chongqing Medical University, Chongqing 400010, China. E-mail: 1209014639@qq.com

Submitted on May 1, 2016; resubmitted on August 29, 2016; accepted on September 1, 2016

---

## TABLE OF CONTENTS

---

- Introduction
  - Methods
    - Literature search
    - Study selection
    - Data extraction
    - Quality assessment
    - Statistical analysis
  - Results
    - Literature search
    - Study characteristics and quality assessment
    - Parity and PLC risk
    - MHTs and PLC risk
    - Age at first birth and PLC risk
    - Age at menarche and PLC risk
    - Age at menopause and PLC risk
    - Other hormonal exposures and PLC risk
  - Discussion
  - Conclusions
- 

<sup>†</sup>These authors contributed equally to this study.

**BACKGROUND:** A striking gender disparity in the incidence and outcome of primary liver cancer (PLC) has been well recognized. Mounting evidence from basic research suggests that hormonal factors may be involved in the gender disparity of PLC. Whether hormonal exposures in human subjects are associated with PLC risk is largely unknown.

**OBJECTIVE AND RATIONALE:** Whether reproductive factors and use of menopausal hormone therapies (MHTs) in women are associated with PLC risk remains controversial. We conducted this study to clarify this issue.

**SEARCH METHODS:** PubMed and EMBASE were searched to July, 2016 for studies published in English or Chinese. Observational studies (cohort, nested case-control and case-control) that provided risk estimates of reproductive factors, MHTs and PLC risk were eligible. The quality of included studies was determined based on the Newcastle-Ottawa quality assessment scale. Summary risk ratios (RRs) were calculated using a random-effects model. Dose–response analysis was conducted where possible.

**OUTCOMES:** Fifteen peer-reviewed studies, involving 1795 PLC cases and 2 256 686 women, were included. Overall meta-analyses on parity and PLC risk did not find any significant associations; however, when restricting to studies with PLC cases  $\geq 100$ , increasing parity was found to be significantly associated with a decreased risk of PLC [RR for the highest versus lowest parity 0.67, 95% CI 0.52, 0.88; RR for parous versus nulliparous 0.71, 95% CI 0.53, 0.94; RR per one live birth increase 0.93, 95% CI 0.88, 0.99]. A J-shaped relationship between parity and PLC risk was identified ( $P_{\text{non-linearity}} < 0.01$ ). Compared with never users, the pooled RRs of PLC were 0.60 (95% CI 0.37, 0.96) for ever users of MHT, 0.73 (95% CI 0.46, 1.17) for ever users of estrogen-only therapy (ET) and 0.67 (95% CI 0.45, 1.02) for ever users of estrogen–progestin therapy (EPT). The pooled RR of PLC for the oldest versus youngest category of menarcheal age was 0.50 (95% CI 0.32, 0.79). Oophorectomy was significantly associated with an increased risk of PLC (RR 2.23, 95% CI 1.46, 3.41). No significant association of age at first birth, and spontaneous or induced abortion with PLC risk was found. No meta-analysis was performed for the association of age at menopause, breastfeeding, hysterectomy, menopausal status and stillbirth with PLC risk owing to huge methodological heterogeneity and/or very limited studies.

**WIDER IMPLICATIONS:** Parity is associated with PLC risk in a J-shaped dose–response pattern. Late age at menarche and ever use of MHT are associated with a reduced risk of PLC, whereas there is no association of ever use of ET and EPT, age at first birth, or spontaneous and induced abortion with PLC risk. Compared to women with no history of oophorectomy, those with a history of oophorectomy are at an increased risk of PLC. Our findings provide some epidemiological support for a role of hormonal exposures in the development of PLC in women. However, these findings should be interpreted with much caution because of the limited number of studies and potential biases, and need to be validated by studies with good design and large sample size.

**Key words:** parity / menopausal hormone therapy / menarche / oophorectomy / abortion / meta-analysis / primary liver cancer

## Introduction

Primary liver cancer (PLC) is the sixth most common cancer globally, accounting for approximately 6% of all new cancer cases (Zimmermann *et al.*, 2016). The prognosis for PLC is poor, with 5-year relative survival of about 18% in the USA (Siegel *et al.*, 2016) and age standardized 5-year relative survival of about 10% in China (Zeng *et al.*, 2015). Currently, PLC is the second leading cause of cancer-related death worldwide because of its high incidence and poor prognosis. A striking gender disparity in the incidence of PLC has been well recognized (Seton-Rogers, 2014), with males being 2–3 times more likely to develop the disease than females (McGlynn and London, 2011). Moreover, compared with female patients with PLC, male patients have shorter overall survival time (Yang *et al.*, 2014) and a higher recurrence rate (Ikeda *et al.*, 2003). Some argue that these gender differences in the incidence and outcome of PLC can be attributable to a higher prevalence of cigarette smoking, alcohol abuse, and hepatitis B virus (HBV) or hepatitis C virus (HCV) infection in males than in females (Wands, 2007). However, similar gender disparity has also been observed in mouse models of PLC induced by chemical carcinogens (Ghebranious and Sell, 1998; Maeda *et al.*, 2005; Wands, 2007), indicating that the gender disparity in PLC cannot be completely explained by the greater prevalence of common PLC risk factors in males compared with females (McGlynn and London, 2011).

Interestingly, animal studies found that ovariectomy increased the incidence of liver tumor in diethylnitrosamine-treated female mice and administration of estrogen to diethylnitrosamine-treated male mice decreased the incidence of liver tumor (Nakatani *et al.*, 2001; Li *et al.*, 2015), indicating a protective effect of estrogen against PLC. The underlying molecular mechanisms behind this protective effect have been proposed (Liu and Liu 2014; Shi *et al.*, 2014; Montella *et al.* 2015), mainly involving the anti-inflammatory effect of estrogen (Fig. 1). Specifically, interleukin (IL)-1 $\alpha$  released by diethylnitrosamine-induced necrotic hepatocytes can target and activate several signaling pathways in Kupffer cells (Sakurai *et al.*, 2008), including the MyD88-dependent nuclear factor  $\kappa$ B signaling pathway (Naugler *et al.*, 2007), signal transducer and activator of transcription 3 signaling pathway (Fan *et al.*, 2013) and CCAAT/enhancer-binding protein  $\beta$  signaling pathway (Liu and Liu 2014). The activation of these signaling pathways then results in the production of IL-6, which in turn promotes cancer-related inflammation, hepatic injury and compensatory proliferation of hepatocytes, finally leading to the occurrence of PLC (Naugler *et al.*, 2007; Mantovani *et al.*, 2008). Estrogen can bind to estrogen receptor  $\alpha$  located in the nucleus of Kupffer cells, and then inhibits the production of IL-6 to exert its protective effect through interfering with the activity of the aforementioned signaling pathways (Naugler *et al.*, 2007). Estrogen can also inhibit the transcription of HBV genes (Wang *et al.*, 2012) and the production of HCV infectious particles (Hayashida *et al.*, 2010), which

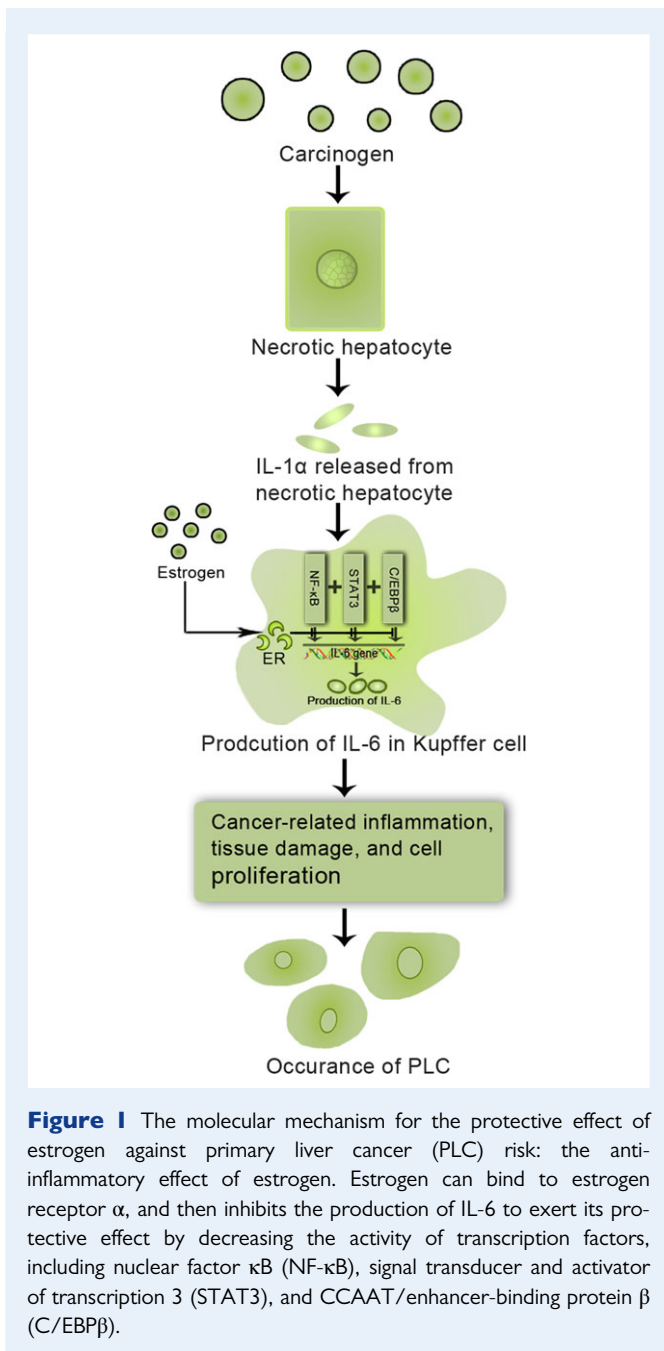

**Figure 1** The molecular mechanism for the protective effect of estrogen against primary liver cancer (PLC) risk: the anti-inflammatory effect of estrogen. Estrogen can bind to estrogen receptor  $\alpha$ , and then inhibits the production of IL-6 to exert its protective effect by decreasing the activity of transcription factors, including nuclear factor  $\kappa$ B (NF- $\kappa$ B), signal transducer and activator of transcription 3 (STAT3), and CCAAT/enhancer-binding protein  $\beta$  (C/EBP $\beta$ ).

possibly explains, at least in part, its protective role in PLC. It is noteworthy that the protective effect of estrogen can be mediated by the expression level of microRNA-18a (Liu et al., 2009), and is dependent on Foxa1/2 genes (Li et al., 2012). The aforementioned molecular mechanisms on the protective effect of estrogen against PLC provide an explanation for the observed gender disparity of PLC in humans. Furthermore, these results from basic research suggest that hormonal exposures in humans may be associated with PLC risk.

However, the results from observational studies on hormonal exposures and PLC risk remain controversial. For example, several studies found no association between parity and PLC risk (Hsing et al., 1992; Lambe et al., 1993; McGlynn et al., 2015), whereas

others found that parity was inversely associated with PLC risk (Yu et al., 2003; Fwu et al., 2009). Similarly, menopausal hormone therapy (MHT) use was found to be related to a decreased risk of PLC in several studies (Fernandez et al., 2003; Yu et al., 2003; McGlynn et al., 2016), while no association was found in others (Persson et al., 1996; McGlynn et al., 2015).

To the best of our knowledge, a systematic review and meta-analysis on hormonal exposures and PLC risk is not available currently. Therefore, we conducted this study to determine whether reproductive factors and use of MHTs in women were associated with PLC risk. Moreover, we investigated the potential dose-response relationship between these exposures and PLC risk where possible.

## Methods

### Literature search

To identify relevant studies, a comprehensive electronic search of PubMed and EMBASE databases was performed from their inception to July 2016. Supplementary Table S1 online shows our detailed search strategy. The bibliographies of all included studies and pertinent reviews were checked carefully for identifying additional studies. We did not contact the corresponding authors to obtain extra data.

### Study selection

All observational studies (cohort, nested case-control or case-control studies) published in English or Chinese were eligible for inclusion if they provided risk estimates and corresponding CIs on the association of reproductive factors (parity, age at first birth, age at menarche, age at menopause, oophorectomy, spontaneous and induced abortion, breastfeeding, hysterectomy, menopausal status and stillbirth) and MHTs [estrogen-only therapy (ET), estrogen-progestin therapy (EPT) or MHT] with PLC risk. Here, MHT refers to any hormone therapy, often of unknown or unspecified formulations. Conference abstracts were not considered in this study, considering that their results can change between meeting presentation and peer-reviewed publication. On the basis of prespecified inclusion criteria, two reviewers (J.H.C. and K.W.) first scrutinized titles and abstracts to exclude apparently ineligible studies, and then read the full text carefully to further exclude ineligible studies. Any discrepancies were resolved by discussion.

### Data extraction

One reviewer (J.H.C.) extracted data through a standardized data collection form, and then another reviewer (K.W.) checked the data for accuracy. Any inconsistent results were handled by discussion. The following information was extracted: first author's family name, publication date, study location, study period, study design, study source, exposure ascertainment method, mean age, the number of PLC cases, sample size, exposure variables and their categories, the most fully adjusted risk estimates with corresponding 95% CIs and adjustment factors.

### Quality assessment

Two reviewers (J.H.C. and K.W.) conducted quality assessment of included studies independently through applying the Newcastle-Ottawa quality assessment scale. This scale comprises eight items, which fall into

three domains, namely selection, comparability and outcome. After evaluating these three domains of each individual study, it could be scored a maximum of nine stars. A study earning seven or more stars was considered to be of high quality. Any disagreements on the results of quality assessment were resolved by discussion.

## Statistical analysis

We pooled the risk estimate from each study using a random-effects model. Risk ratio (RR) was employed to assess the association of reproductive factors and MHTs with PLC risk. Hazard ratio (Fwu *et al.*, 2009; McGlynn *et al.*, 2015), odds ratio (Hsing *et al.*, 1992; Lambe *et al.*, 1993; Mucci *et al.*, 2001; Fernandez *et al.*, 2003; Yu *et al.*, 2003; Kanazir *et al.*, 2010; Amr *et al.*, 2014; McGlynn *et al.*, 2016) and standardized incidence ratio (Persson *et al.*, 1996) were directly treated as equivalent to RR. For two studies (Stanford and Thomas, 1992; Lambe *et al.*, 1993) whose authors provided risk estimates stratified by the number of live births, we pooled these stratum data through a random-effects model to approximate risk estimates for ever-parous women. Similarly, we pooled data stratified by the number of induced abortions to calculate risk estimates for women who ever had induced abortion (Stanford and Thomas, 1992). We regarded the number of full-term pregnancies as the number of live births in two studies (Yu *et al.*, 2003; Amr *et al.*, 2014). The Q statistic (a  $P < 0.10$  indicating statistical significance) and the  $I^2$  statistic (Higgins *et al.*, 2003) (an  $I^2$  of  $>75.0\%$ ,  $50.0\text{--}75.0\%$  and  $<50\%$  indicating substantial, moderate and low heterogeneity, respectively) were used to qualitatively and quantitatively evaluate statistical heterogeneity, respectively.

We used a random-effects dose–response meta-regression model proposed by Orsini *et al.* (2006) to calculate RRs and 95% CIs for 1-unit increment in exposure level of variables of interest. This model is based on specific exposure level, distribution of cases and person-years or controls, and adjusted RRs with 95% CIs for at least three quantitative categories. When studies reported exposure level as an interval, the midpoint of lower and upper limits was designated as the assigned dose. If the highest category was open-ended, it was assumed to share the same width as the preceding interval. If the lowest category was open-ended, the assigned dose was calculated by subtracting half of the width of the adjacent interval from the specified lowest value (Hartemink *et al.*, 2006). For one study (McGlynn *et al.*, 2015), whose authors did not provide person-years by exposure level, these data were approximately estimated by multiplying the number of participants in each exposure level with the mean follow-up duration of this study. The method described by Hamling *et al.* (2008) was used to finish data conversion for two studies (Stanford and Thomas, 1992; Yu *et al.*, 2003) where the reference category was not the lowest category. A potential non-linear dose–response association of reproductive factors and MHTs with PLC risk was examined through restricted cubic spline models with three knots at the 10th, 50th and 90th percentiles (Desquilbet and Mariotti, 2010; Orsini *et al.*, 2012). A  $P_{\text{non-linearity}}$  was yielded by testing the null hypothesis that the regression coefficient of the second spline equals zero (Desquilbet and Mariotti, 2010).

Three methods of sensitivity analysis were used to determine the stability of summary risk estimates, namely repeating meta-analysis with a fixed-effects model, applying diverse eligibility criteria and ignoring one study in turn. Prespecified subgroup analyses were performed to determine whether the observed associations were modified by study design, the number of PLC cases, study location, data source, and adjustment for HBV or HCV infection. We calculated a  $P_{\text{interaction}}$  for the difference between subgroups through meta-regression. Note that sensitivity and subgroup analyses were only performed for parity owing to the limited studies available for the remaining exposure variables of interest, and were based on RRs for the highest versus lowest categories of parity.

We did not test publication bias with the formal statistical tests, because they have limited power when there are  $<10$  studies. We conducted all data analyses through STATA software (version 12.0, StataCorp LP, College Station, Texas, USA). Statistical significance level was set at  $P < 0.05$  under a two-sided test unless otherwise specified.

## Results

### Literature search

The initial literature retrieval identified 4943 and 6256 citations from PubMed and EMBASE databases, respectively. A total of 7714 citations remained after removing duplicated reports. Of these remained citations, 7687 citations were excluded after scrutinizing titles and abstracts. Thirteen citations were also excluded after carefully reading the full text (Supplementary Table S2 summarizes excluded studies and corresponding reasons for exclusion). One study (Yu *et al.*, 1991) was found to be eligible for inclusion in the process of reviewing reference lists. Finally, a total of 15 studies were included in this study (Fig. 2).

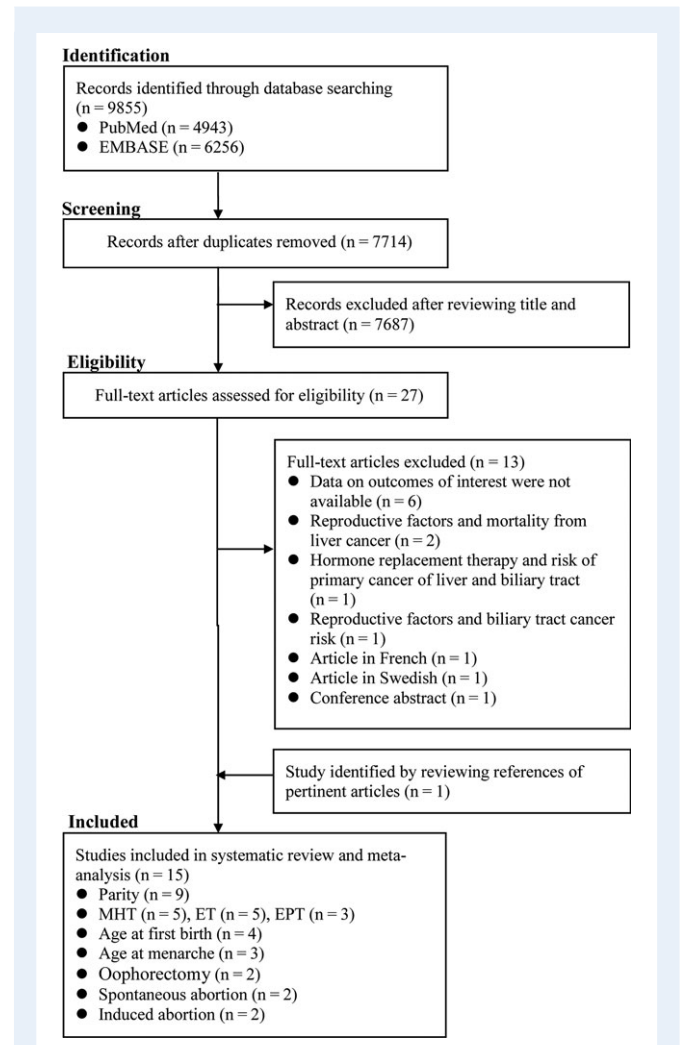

**Figure 2** The flowchart of identifying relevant studies. EPT, estrogen–progestin therapy; ET, estrogen-only therapy; MHT, menopausal hormone therapy.

## Study characteristics and quality assessment

The characteristics of included studies are summarized in Table 1. These studies were published between 1991 (Yu et al., 1991) and 2016 (McGlynn et al., 2016). Eight studies (La Vecchia et al., 1992; Stanford and Thomas, 1992; Tavani et al., 1993; Mucci et al., 2001; Fernandez et al., 2003; Yu et al., 2003; Kanazir et al., 2010; Amr et al., 2014) recruited their participants from the hospital, whereas the remaining seven studies (Yu et al., 1991; Hsing et al., 1992; Lambe et al., 1993; Persson et al., 1996; Fwu et al., 2009; McGlynn et al., 2015, 2016) recruited participants from the general population. The methods of exposure ascertainment were somewhat varied across studies, including interviewing participants through a questionnaire (Yu et al., 1991, 2003; La Vecchia et al., 1992; Stanford and Thomas, 1992; Tavani et al., 1993; Fernandez et al., 2003; Kanazir et al., 2010; Amr et al., 2014), mailing a questionnaire to participants (Hsing et al., 1992; McGlynn et al., 2015) and using records from the national registry (Lambe et al., 1993; Persson et al., 1996; Fwu et al., 2009). The number of PLC cases ranged from 13 (Kanazir et al., 2010) to 339 (McGlynn et al., 2016), resulting in a total of 1795 PLC cases; the sample size varied from 39 (Kanazir et al., 2010) to 1 420 784 (Fwu et al., 2009), yielding a total of 2 256 686 subjects. Most included studies provided adjusted risk estimates, and most adjusted for age. As for quality assessment, nine studies were awarded  $\geq 7$  stars, and the remaining six studies were awarded 6 stars, indicating that the quality of included studies was generally good (Supplementary Tables S3 and S4).

## Parity and PLC risk

Nine studies (Hsing et al., 1992; La Vecchia et al., 1992; Stanford and Thomas, 1992; Lambe et al., 1993; Yu et al., 2003; Fwu et al., 2009; Kanazir et al., 2010; Amr et al., 2014; McGlynn et al., 2015) were eligible for the association between parity and PLC risk, involving a total of 1180 PLC cases and 2 224 642 females. Overall, the summary RR of PLC for the highest versus lowest categories of parity was 1.30 (95% CI 0.74, 2.27), with substantial heterogeneity ( $I^2 = 74.0\%$ ,  $P_{\text{heterogeneity}} < 0.01$ , 9 studies) (Fig. 3). Likewise, the summary RR of PLC for ever parity versus nulliparous was 1.42 (95% CI 0.76, 2.66), with substantial heterogeneity ( $I^2 = 86.4\%$ ,  $P_{\text{heterogeneity}} < 0.01$ , 5 studies) (Supplementary Fig. S1). The random-effects dose-response meta-regression model showed that the RR per one live birth increase in parity was 1.00 (95% CI 0.95, 1.05, goodness-of-fit  $\chi^2_{27} = 46.5$ ,  $P_{\text{goodness-of-fit}} = 0.01$ , 7 studies). Using restricted cubic spline model, we found a J-shaped curve for the association of parity with PLC risk ( $P_{\text{non-linearity}} < 0.01$ ) (Fig. 4). Compared with nulliparous women, the summary RRs were 0.87 (95% CI 0.79, 0.96) for women with one live birth, 0.80 (95% CI 0.67, 0.94) for those with two live births, 0.81 (95% CI 0.67, 0.98) for those with three live births, 0.90 (95% CI 0.73, 1.10) for those with four live births, 1.04 (95% CI 0.81, 1.33) for those with five live births and 1.23 (95% CI 0.89, 1.69) for those with six live births.

In subgroup analyses on parity and PLC risk, no evidence of modification effect by study design, study location, data source, and adjustment for HBV or HCV infection was observed (all  $P_{\text{interaction}} > 0.05$ , Supplementary Table S5). However, we found strong evidence of modification effect by the number of PLC cases ( $P_{\text{interaction}} < 0.01$ ),

with an inverse association among studies with cases  $\geq 100$  but a positive association among studies with cases  $< 100$ . When restricting meta-analysis for ever parity versus nulliparous and random-effects dose-response meta-regression analysis to studies with cases  $\geq 100$  and to those with cases  $< 100$ , we found similar results (Supplementary Table S6). In addition, we observed that the dose-response curve for the association of parity with PLC risk was non-linear in studies with cases  $\geq 100$  ( $P_{\text{non-linearity}} < 0.01$ ) but was linear in those with cases  $< 100$  ( $P_{\text{non-linearity}} = 0.27$ ) (Supplementary Fig. S2).

Omitting a single study in turn did not significantly alter the initial association between parity and PLC risk (Supplementary Fig. S3), with the pooled RRs ranging from 1.08 (95% CI 0.64, 1.81) (Stanford and Thomas, 1992) to 1.56 (95% CI 0.85, 2.88) (Yu et al., 2003). Repeating the analysis with a fixed-effects model and changing eligibility criteria did not significantly alter the initial association of parity with PLC risk, either (Supplementary Table S7).

## MHTs and PLC risk

Seven studies (Yu et al., 1991, 2003; Tavani et al., 1993; Persson et al., 1996; Fernandez et al., 2003; McGlynn et al., 2015, 2016) were included for the association between MHT use and PLC risk, involving a total of 1031 PLC cases and 832 379 participants. Compared with never users, the combined RRs of developing PLC were 0.60 (95% CI 0.37, 0.96,  $I^2 = 75.5\%$ ,  $P_{\text{heterogeneity}} < 0.01$ , 5 studies) for ever users of MHT, 0.73 (95% CI 0.46, 1.17,  $I^2 = 35.6\%$ ,  $P_{\text{heterogeneity}} = 0.18$ , 5 studies) for ever users of ET and 0.67 (95% CI 0.45, 1.02,  $I^2 = 0.0\%$ ,  $P_{\text{heterogeneity}} = 0.89$ , 3 studies) for ever users of EPT (Fig. 5).

## Age at first birth and PLC risk

Only four studies (La Vecchia et al., 1992; Stanford and Thomas, 1992; Lambe et al., 1993; McGlynn et al., 2015) were eligible for the relationship of age at first birth to PLC risk, involving a total of 543 PLC cases and 801 400 participants. On the basis of limited studies, the present meta-analysis failed to find a significant association (RR 0.71, 95% CI 0.42, 1.19,  $I^2 = 0.0\%$ ,  $P_{\text{heterogeneity}} = 0.96$ , 4 studies) (Supplementary Fig. S4) when comparing women in the oldest age at first birth category with those in the youngest age at first birth category. There was also no significant dose-response relationship between age at first birth and PLC risk (RR for every 1 year delay 0.99, 95% CI 0.98, 1.00, goodness-of-fit  $\chi^2_{12} = 5.82$ ,  $P_{\text{goodness-of-fit}} = 0.92$ , 4 studies). Evidence of a linear dose-response relationship of age at first birth to PLC risk was found ( $P_{\text{non-linearity}} = 0.35$ , 4 studies) (Supplementary Fig. S5).

## Age at menarche and PLC risk

Only three studies (Yu et al., 2003; Kanazir et al., 2010; McGlynn et al., 2015) met inclusion criteria for the relationship between age at menarche and PLC risk, involving 479 PLC cases and 800 486 women in total. The summarized RR of PLC for the oldest age group compared with the youngest age group was 0.50 (95% CI 0.32, 0.79,  $I^2 = 16.2\%$ ,  $P_{\text{heterogeneity}} = 0.30$ , 3 studies) (Fig. 6).

**Table 1** Characteristics of included studies on reproductive factors and MHTs and PLC risk.

| Study; location                       | Study period | Study design        | Study source     | Exposure ascertainment                       | Mean age (y)    | Cases/SS      | Exposure variables                                                                                      | Adjustment factors                                                                                                                                                              |
|---------------------------------------|--------------|---------------------|------------------|----------------------------------------------|-----------------|---------------|---------------------------------------------------------------------------------------------------------|---------------------------------------------------------------------------------------------------------------------------------------------------------------------------------|
| McGlynn <i>et al.</i> (2016); UK      | 1988–2011    | Nested case-control | Population-based | Medical records                              | 67.9            | 339/1657      | ET, EPT, MHT                                                                                            | Alcohol-related disorders, aspirin, bilateral oophorectomy, BMI, diabetes, diabetes medications, HBV, HCV, hysterectomy, metabolic disorders, paracetamol use, smoking, statins |
| McGlynn <i>et al.</i> (2015); USA     | NA           | Cohort              | Population-based | Questionnaire mailed to participants         | NA              | 248/799 500   | ET, EPT, MHT, age at menarche, age at menopause, age at first birth, parity, oophorectomy, hysterectomy | Age, alcohol, BMI, diabetes, education race, smoking, parent cohort study                                                                                                       |
| Amr <i>et al.</i> (2014); Egypt       | 1999–2009    | Case-control        | Hospital-based   | Face-to-face interview through questionnaire | 46.5            | 132/801       | Parity                                                                                                  | Age, birthplace, education, HBV                                                                                                                                                 |
| Kanazir <i>et al.</i> (2010); Serbia  | 2004–2007    | Case-control        | Hospital-based   | Face-to-face interview through questionnaire | (>60)           | 13/39         | Age at menarche, age at menopause, parity, breastfeeding                                                | None                                                                                                                                                                            |
| Fwu <i>et al.</i> (2009); Taiwan      | 1983–2003    | Cohort              | Population-based | Records from national registry               | 27.5            | 202/1 420 784 | Parity                                                                                                  | Age at the last test, HBsAg status                                                                                                                                              |
| Yu <i>et al.</i> (2003); Taiwan       | 1998–2001    | Case-control        | Hospital-based   | Face-to-face interview through questionnaire | 52.1            | 218/947       | MHT, age at menarche, age at menopause, parity, oophorectomy, menopausal status                         | Age at recruitment, diabetes, hysterectomy, status, type and age of menopause                                                                                                   |
| Fernandez <i>et al.</i> (2003); Italy | 1983–1999    | Case-control        | Hospital-based   | Face-to-face interview through questionnaire | (45–79)         | 105/7081      | HT                                                                                                      | Age, age and type of menopause, alcohol, BMI, education, smoking, study center, year of interview                                                                               |
| Mucci <i>et al.</i> (2001); Greece    | 1995–1998    | Case-control        | Hospital-based   | Face-to-face interview                       | NA              | 50/112        | Age at menopause                                                                                        | Age, alcohol consumption, smoking, years of schooling                                                                                                                           |
| Persson <i>et al.</i> (1996); Sweden  | 1977–1991    | Cohort              | Population-based | Records from national registry               | 54.5            | 14/22 579     | ET, EPT, MHT                                                                                            | None                                                                                                                                                                            |
| Tavani <i>et al.</i> (1993); Italy    | 1984–1992    | Case-control        | Hospital-based   | Face-to-face interview through questionnaire | 59 <sup>a</sup> | 82/532        | ET                                                                                                      | Age                                                                                                                                                                             |
| Lambe <i>et al.</i> (1993); Sweden    | 1958–1984    | Nested case-control | Population-based | Records from national registry               | (24–59)         | 133/798       | Age at first birth, parity                                                                              | Age                                                                                                                                                                             |
| Stanford and Thomas (1992);           | 1979–1986    | Case-control        | Hospital-based   | Face-to-face interview                       | 39.8            | 83/679        | Age at first birth, parity, spontaneous abortion, induced                                               | Age, center, year of interview                                                                                                                                                  |

Continued

Table 1 Continued

| Study: location                     | Study period | Study design | Study source     | Exposure ascertainment                       | Mean age (y)    | Cases/SS | Exposure variables                                                                   | Adjustment factors                                                                |
|-------------------------------------|--------------|--------------|------------------|----------------------------------------------|-----------------|----------|--------------------------------------------------------------------------------------|-----------------------------------------------------------------------------------|
| China, Kenya, Philippines, Thailand |              |              |                  | through questionnaire                        |                 |          | abortion, breastfeeding, number of stillbirths                                       |                                                                                   |
| La Vecchia et al. (1992); Italy     | 1984–1991    | Case-control | Hospital-based   | Face-to-face interview through questionnaire | NA <sup>b</sup> | 79/423   | Age at first birth, age at menopause, parity, spontaneous abortion, induced abortion | Age, alcohol consumption, education, history of hepatitis, oral contraceptive use |
| Hsing et al. (1992); USA            | 1985–1986    | Case-control | Population-based | Questionnaire mailed to participants         | NA              | 72/671   | Parity                                                                               | Age at death, duration of oral contraceptive use, race                            |
| Yu et al. (1991); USA               | 1984–1990    | Case-control | Population-based | Interview through questionnaire              | 59.1            | 25/83    | ET                                                                                   | Duration of oral contraceptive use                                                |

EPT, estrogen–progestin therapy; ET, estrogen therapy; HBsAg, hepatitis B surface antigen; HBV, hepatitis B virus; HCV, hepatitis C virus; MHTs, menopausal hormone therapies; NA, not available; PLC, primary liver cancer; SS, sample size; y, year.

<sup>a</sup>Median value.

<sup>b</sup>The median age for cases and controls was 57 and 58 years, respectively.

## Age at menopause and PLC risk

Five studies (La Vecchia et al., 1992; Mucci et al., 2001; Yu et al., 2003; Kanazir et al., 2010; McGlynn et al., 2015) were eligible for the association between age at menopause and PLC risk, involving a sum of 608 PLC cases and 801 021 subjects. Considering the huge methodological heterogeneity across studies, we did not perform a meta-analysis for this association. Supplementary Table S8 summarizes included studies on age at menopause and PLC risk. Overall, the results derived from these 5 studies are inconclusive. A large cohort study (McGlynn et al., 2015) revealed no association between age at menopause and the risk of hepatocellular carcinoma (HCC), which is in agreement with the findings from a case-control study (La Vecchia et al., 1992). Two case-control studies (Yu et al., 2003; Kanazir et al., 2010) showed that early age at menopause increased the risk of HCC, whereas another case-control study (Mucci et al., 2001) showed that late age at menopause increased the risk of HCC.

## Other hormonal exposures and PLC risk

In addition to the aforementioned hormonal exposures, we also investigated the association between other hormonal exposures and PLC risk, including oophorectomy (unilateral or bilateral), spontaneous and induced abortion, breastfeeding, hysterectomy, menopausal status and stillbirth (Supplementary Table S9 and Supplementary Fig. S6). Overall, there were very limited studies evaluating PLC risk in relation to these hormonal exposures. On the basis of these studies, oophorectomy was found to be significantly associated with an increased risk of PLC (RR 2.23, 95% CI 1.46, 3.41,  $I^2 = 0.0\%$ ,  $P_{\text{heterogeneity}} = 0.50$ , 2 studies), whereas no significant association of spontaneous or induced abortion with PLC risk was found (RR for spontaneous abortion 1.10, 95% CI 0.71, 1.70,  $I^2 = 0.0\%$ ,  $P_{\text{heterogeneity}} = 0.41$ , 2 studies; RR for induced abortion 1.27, 95% CI 0.76, 2.14,  $I^2 = 0.0\%$ ,  $P_{\text{heterogeneity}} = 0.48$ , 2 studies) (Supplementary Fig. S6).

## Discussion

Findings from the highest versus lowest meta-analysis, ever versus never meta-analysis and the dose–response meta-regression analysis consistently revealed no association between parity and PLC risk. However, when restricting these analyses to studies with PLC cases  $\geq 100$ , increasing parity was consistently found to be associated with a decreased risk of PLC. Based on all included studies or those with PLC cases  $\geq 100$ , a non-linear dose–response analysis identified a J-shaped curve for the association of parity with PLC risk. Ever use of MHT was related to a reduced risk of PLC, whereas ever use of ET and EPT was not related to PLC risk. On the basis of limited studies, females in the oldest category of menarcheal age were found to be at lower risk of PLC than those in the youngest category of menarcheal age; however, as for age at first birth and PLC risk, there was no significant risk difference between females in the oldest age category and those in the youngest age category.

In the present study, we observed substantial heterogeneity across studies for the association between parity and PLC risk. As indicated by our subgroup analyses, the number of PLC cases of included

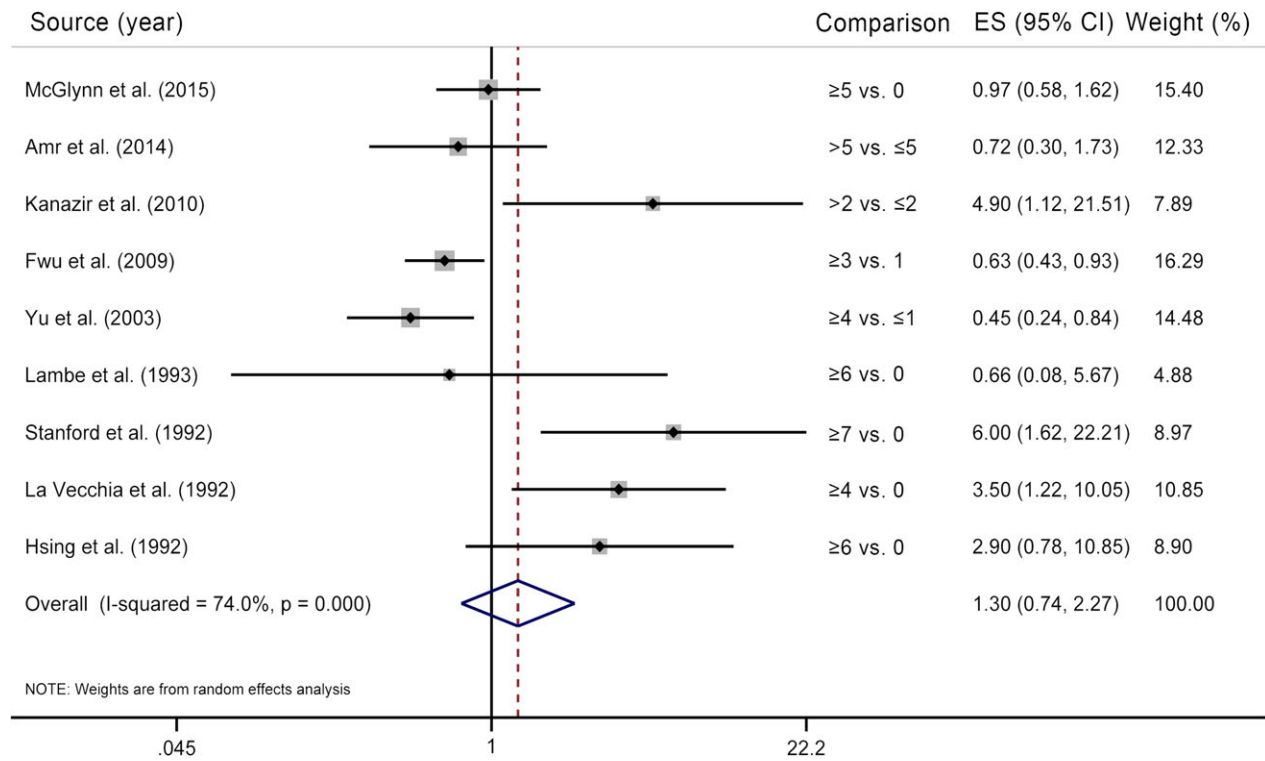

**Figure 3** Highest versus lowest meta-analysis on parity and PLC risk. The squares represent the risk estimate for each individual study, with the area reflecting the weight assigned to the study. The horizontal line across each square represents the 95% CI. The diamond represents the summary risk estimate, with width representing 95% CI. ES, effect size.

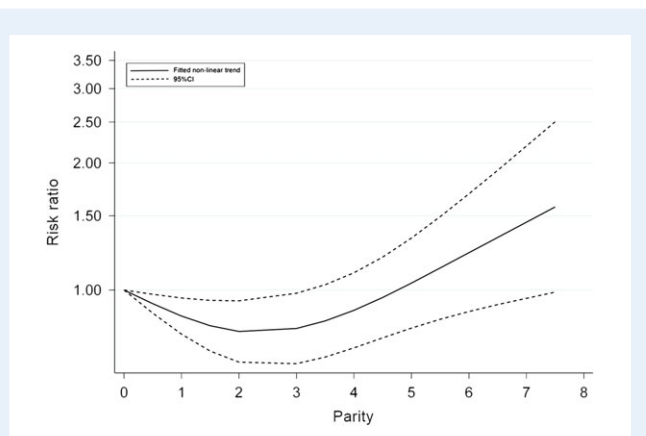

**Figure 4** Non-linear dose–response analysis on parity and PLC risk.

studies contributed predominantly to the observed heterogeneity. Specifically, meta-analysis in studies with PLC cases  $\geq 100$  (Lambe et al., 1993; Yu et al., 2003; Fwu et al., 2009; Amr et al., 2014; McGlynn et al., 2015) revealed an inverse association between parity and PLC risk; in contrast, meta-analysis in those with PLC cases

$< 100$  (Hsing et al., 1992; La Vecchia et al., 1992; Stanford and Thomas, 1992; Kanazir et al., 2010) revealed a positive association. We observed that the overall sample size of these studies with PLC cases  $< 100$  was also small, with the maximum sample size of only 679 subjects (Stanford and Thomas, 1992). It has been indicated that compared with larger studies, smaller studies tend to report larger risk estimates and are performed with less methodological rigor (Sterne et al., 2001; Nnoaham et al., 2012), which is commonly known as small study effects (Nuesch et al., 2010). Four studies with  $< 100$  PLC cases (Hsing et al., 1992; La Vecchia et al., 1992; Stanford and Thomas, 1992; Kanazir et al., 2010) were case-control studies, of which three were hospital-based (La Vecchia et al., 1992; Stanford and Thomas, 1992; Kanazir et al., 2010). As is well known, case-control studies, especially hospital-based ones, are more prone to selection bias and recall bias than cohort studies, and possibly provide spurious results. In addition, three of those studies (Hsing et al., 1992; Stanford and Thomas, 1992; Kanazir et al., 2010) with  $< 100$  PLC cases did not adjust for the common risk factors of PLC, including HBV or HCV infection, alcohol and diabetes, suggesting that their results might be biased by residual confounding. Considering the above-mentioned facts, along with the fact that a J-shaped curve was identified based on all included studies or those with  $\geq 100$  PLC cases, we concluded that parity was associated with PLC risk in a J-shaped dose–response fashion. However, it should be remembered



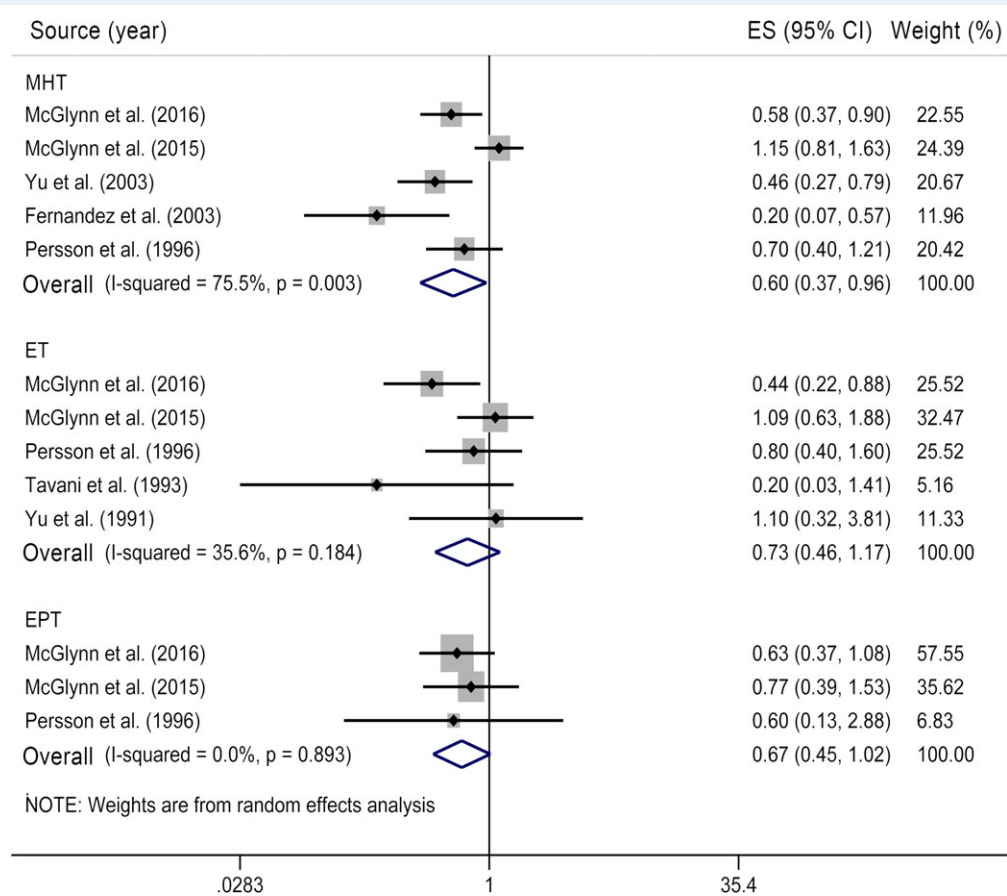

**Figure 5** Meta-analyses of MHTs and PLC risk. The squares represent the risk estimate for each individual study, with the area reflecting the weight assigned to the study. The horizontal line across each square represents the 95% CI. The diamond represents the summary risk estimate, with width representing 95% CI.

that this conclusion is based on limited studies, and therefore needs to be confirmed by more large and well-designed studies.

The effect of exogenous hormone use on the PLC risk reduction has received significant attention. An early animal study found that oral contraceptive steroid was a promoter of hepatocarcinogenesis (Yager and Yager, 1980). However, a recent meta-analysis of 17 epidemiological studies suggested that there was no significant association between oral contraceptive use and PLC risk (An, 2015). To our knowledge, no meta-analysis has been conducted to investigate the association between use of MHTs and PLC risk. Therefore, the present study is the first meta-analysis addressing this association. Interestingly, our results suggested that compared with never users, ever users of MHT were at a decreased risk of PLC, whereas there was no significant difference in PLC risk between ever users and never users of ET and EPT. To interpret the above difference related to hormonal formulation is challenging. One straightforward explanation for the non-significant result on the association of ET and EPT with PLC risk is the lack of power, considering the relatively wide CIs for risk estimates and limited studies available for the association. In fact, if including a conference abstract submitted by Botrus et al. (2015) and then pooling corresponding risk estimates with those of the 5 included studies on ET and PLC risk, a significant result can be

obtained [0.61 (95% CI 0.38, 0.99,  $I^2 = 58.6\%$ ,  $P_{\text{heterogeneity}} = 0.03$ )]. An alternative biologically plausible explanation for this observation is that the inverse association between MHT and PLC risk is attributable predominantly to hormone therapies other than ET or EPT, such as progesterone therapy. Unfortunately, we cannot validate this explanation further as there seems to be no study evaluating the association of progesterone therapy with PLC risk. Taken together, the results on MHTs and PLC risk should be interpreted with caution, and more studies are needed.

The postmenopausal period is considered a crucial transition time for women's health, and good menopausal health carries substantial societal benefits (Jaspers et al., 2015). Age at menopause is thought to reflect cumulative lifetime exposure to reproductive hormones (Joffe and Bromberger, 2016), and its determinants mainly include socioeconomic position, lifestyle and dietary factors, race/ethnicity, heritability and reproductive history (Meschia et al., 2000; Lawlor et al., 2003; Nagel et al., 2005; Shobeiri and Nazari, 2014). Early age at menopause has been related to many adverse health outcomes, including increased risks of type 2 diabetes (Brand et al., 2013), dementia (Coppus et al., 2010), heart failure (Ebong et al., 2014), venous thromboembolism (Canonic et al., 2014) and depression (Georgakis et al., 2016). Our study attempted to quantify the

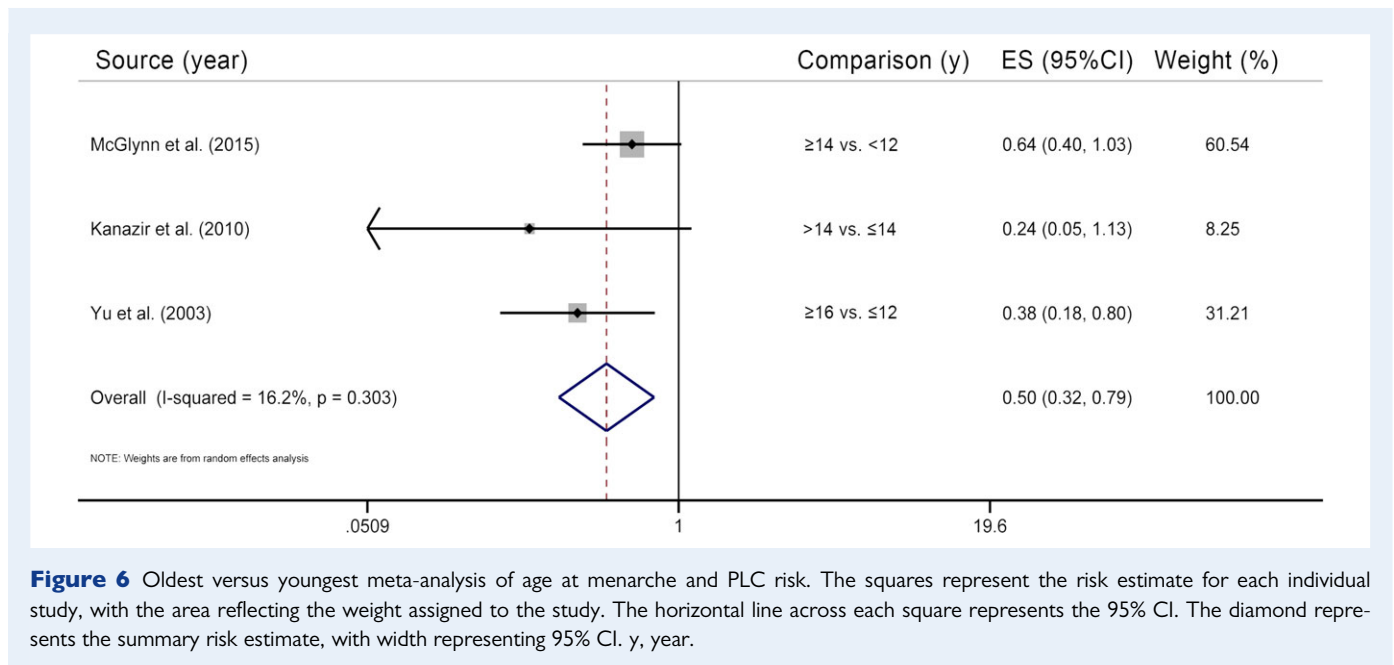

**Figure 6** Oldest versus youngest meta-analysis of age at menarche and PLC risk. The squares represent the risk estimate for each individual study, with the area reflecting the weight assigned to the study. The horizontal line across each square represents the 95% CI. The diamond represents the summary risk estimate, with width representing 95% CI. y, year.

relationship between age at menopause and PLC risk; however, huge heterogeneity across studies precluded our attempt. Consequently, we could not determine the magnitude and direction of the relationship of age at menopause with PLC risk. Nevertheless, a clinical retrospective study found that early age at surgical menopause significantly increased the risk of nonalcoholic fatty liver disease among women with endometrial cancer (Matsuo et al., 2016). Considering the positive association between nonalcoholic fatty liver disease and PLC risk (Zoller and Tilg, 2016), along with the protective effect of estrogen against PLC identified by basic research, we speculate that women with early age at menopause are at higher risk of PLC than those with late age at menopause. Nonetheless, this speculation needs to be confirmed by further studies.

Late age at menarche has been associated with decreased risk of ovarian cancer (Gong et al., 2013) and endometrial cancer (Gong et al., 2015). Similarly, in the present study, highest versus lowest meta-analysis revealed an inverse association between menarcheal age and PLC risk. Considering that age at menarche is a proxy measure of duration of exposure to endogenous estrogens, such a finding appears to be contradictory to the protective effect of estrogen on PLC risk identified by animal studies (Naugler et al., 2007). In addition to age at menarche, our meta-analysis investigated other measures in relation to estrogen levels in women, including parity, MHTs and oophorectomy. We found that increasing parity and MHT use were associated with a decreased risk of PLC, and oophorectomy was associated with an increased risk of PLC; obviously, these findings are inconsistent with that in relation to age at menarche, considering that parity and oophorectomy can significantly increase and decrease serum estrogen levels, respectively. However, it should be pointed out that our finding on age at menarche and PLC risk is derived from the category analysis. The categorization of continuous variables is criticized for the inappropriate assumption of homogeneity of risk within categories, and multiple comparisons that increase the chance of false

positive results (Bennette and Vickers, 2012). In fact, a null association of age at menarche with PLC risk would be observed if performing a random-effects dose-response meta-regression analysis (RR for every 1 year delay 0.97, 95% CI 0.89, 1.05), even though this analysis is based on only two studies (Yu et al., 2003; McGlynn et al., 2015). Moreover, age at menarche is determined by many factors, including socioeconomic status (Deardorff et al., 2014; Krieger et al., 2015), race/ethnicity (Deardorff et al., 2014; Krieger et al., 2015) and BMI (Song et al., 2014). The association of socioeconomic status (Shebl et al., 2012), race/ethnicity (Ha et al., 2016) and BMI (Berentzen et al., 2014) with PLC risk has been well documented. However, of three included studies on age at menarche and PLC risk, only one study adjusted for these potential confounders. Therefore, it is possible that what seemed to be an effect of age at menarche was really an effect of these confounders on PLC risk. Taken together, we cannot exclude the possibility that our results on menarcheal age and PLC risk have been distorted, and more studies are warranted to clarify the association between age at menarche and PLC risk.

The mechanisms of action underlying the association between hormonal exposures and PLC risk observed in our study mainly involve the protective role of sex hormones in PLC. In addition to the inhibitory effect of estrogen on liver tumorigenesis described above (Fig. 1), the protective effect of prolactin as well as progesterone on PLC risk should be also considered. A recent study in a rodent model found that prolactin could prevent liver carcinogenesis via inhibition of activation of the c-Myc oncogene (Hartwell et al., 2014), which is in agreement with results of an earlier study (Yamamoto et al., 1995). Unfortunately, the biological effect of natural progesterone against PLC receives little attention (Yeh et al., 2013). Nonetheless, megestrol acetate, a synthetic progesterone, was found to be capable of suppressing the growth of human liver cancer cells *in vitro* and *in vivo* (Zhang and Chow, 2004).

Our study has several limitations. First, considering that most of included studies were case-control studies, and used an interview to collect the information on diseases and exposures, our results might therefore be subject to recall bias. In addition, non-differential misclassification possibly occurred in classifying the type of MHTs, and therefore would tend to bias our risk estimates toward the null. Second, we cannot determine whether the associations investigated in this study differ between women with and without common risk factors of PLC through subgroup analyses, because of inclusion of only a few studies. Third, we extracted maximally adjusted risk estimates, but the possibility of residual confounding cannot be excluded, given that our findings originate from observational studies where residual confounding always exists. Fourth, we did not assess the publication bias using the formal statistical tests, as they have insufficient power when there are limited studies ( $n < 10$ ). Under this scenario, we cannot rule out the possibility that our pooled results are driven by publication bias. Nevertheless, all systematic reviews and meta-analyses are subject to publication bias, due to the possibility of under-reporting of negative results or failure to identify the 'grey literature' (i.e. the literature that is not published formally by commercial publishers, including conference proceedings, magazine articles, government papers, etc.) (Haddaway et al., 2015). Finally, moderate or substantial heterogeneity was observed in some analyses in our study. Nonetheless, clinical and methodological heterogeneity is always a concern for all meta-analyses, particularly for meta-analysis of observational studies. Moreover, we have explained the heterogeneity observed in the analysis of parity and PLC risk.

The findings of this study have some potential implications for public health and clinical practice. Regarding public health messages, our findings on reproductive factors and PLC risk may contribute to identifying women at higher risk of developing PLC, and entering these at-risk subjects into a surveillance program for PLC at an early stage possibly improves their clinical outcomes. Our meta-analysis showed that ever use of MHT was related to a decreased risk of PLC. Similarly, ever use of EPT is found to be capable of reducing risks of colorectal and endometrial cancer (Lin et al., 2012; Chlebowski et al., 2016). In terms of clinical practice, these benefits seem to encourage clinicians to continue prescribing MHTs to postmenopausal women. However, it should be remembered that EPT use is known to be associated with increased risks of breast (Greiser et al., 2005; Chlebowski et al., 2015) and ovarian cancer (Greiser et al., 2007; Pearce et al., 2009). Therefore, clinicians should weigh carefully the inferred benefits of MHTs against risks involved for a particular patient before making a formal decision. Fortunately, a recent publication from the Women's Health Initiative Estrogen-Alone Trial indicates that adverse event rates of conjugated equine estrogen therapy among postmenopausal women are low and predominantly limited to current users (Jungheim and Colditz, 2011; LaCroix et al., 2011), which attenuates the safety concern of MHTs to some extent.

Previous studies have examined the relationship of hormonal exposures to risks of many cancers, including lung cancer (Greiser et al., 2010), esophageal cancer (Wang et al., 2016), breast cancer (Pan et al., 2014) and ovarian cancer (Greiser et al., 2007). The current study extended this relationship into a broader field, and highlighted the association of hormonal exposures with PLC risk. Despite the contribution of our study to this field, however, there are still some critical issues that need to be addressed, including dose-response

relationship between hormonal exposures and cancer risks, associations of timing of MHT use (i.e. ever/current/former use) with cancer risks, and risk-to-benefit profile of MHT use. When it comes to PLC, in addition to the above issues, further studies are warranted to investigate additional risk factors for identifying more at-risk patients and implementing better prevention measures.

## Conclusions

Our study suggests a J-shaped relationship between parity and PLC risk. Late age at menarche and ever use of MHT reduce PLC risk, whereas no association of ever use of ET and EPT, age at first birth, and spontaneous or induced abortion with PLC risk is found. Women undergoing an oophorectomy have an increased risk of PLC. Our findings provide some epidemiological support for a role of hormonal exposures in the development of PLC in women. However, these findings should be interpreted with much caution owing to the limited number of studies and potential biases, and the need for further validation. Future studies will benefit from an improved design, a large sample size and better control of confounding, and should highlight the potential dose-response effects on reproductive factors, use of MHTs and PLC risk.

## Supplementary Data

Supplementary data are available at <http://humupd.oxfordjournals.org/>.

## Acknowledgements

We thank Dr Yong Zhang (School of Public Health and Management, Chongqing Medical University, Chongqing 400016, China), as well as Prof. Yong Zhao (School of Public Health and Management, Chongqing Medical University, Chongqing 400016, China) for their assistance in our statistical analyses.

## Authors' roles

X.D. and G.C.Z. conceived the study idea. J.H.C. and K.W. performed literature search, study selection, data extraction and quality assessment. F.B.H. performed statistical analyses. Y.L. interpreted results of statistical analyses. G.C.Z. drafted the initial manuscript. C. N. and J.P.G. made critical comment and revision for the initial manuscript. X.D. had primary responsibility for the final content. All authors reviewed and approved the final manuscript.

## Funding

No external funding was received for this study.

## Conflict of Interest

None declared.

## References

- Amr S, Iarocci EA, Nasr GR, Saleh D, Blancato J, Shetty K, Loffredo CA. Multiple pregnancies, hepatitis C, and risk for hepatocellular carcinoma in Egyptian women. *BMC cancer* 2014;**14**:893.
- An N. Oral contraceptives use and liver cancer risk: a dose-response meta-analysis of observational studies. *Medicine* 2015;**94**:e1619.
- Bennette C, Vickers A. Against quantiles: categorization of continuous variables in epidemiologic research, and its discontents. *BMC Med Res Methodol* 2012;**12**:21.
- Berentzen TL, Gamborg M, Holst C, Sorensen TI, Baker JL. Body mass index in childhood and adult risk of primary liver cancer. *J Hepatol* 2014;**60**:325–330.
- Botrus G, Shalaby AS, Kaseb AO, Lenzi R, Abdel-Wahab R, Wolff RA, Hassan M. The protective effect of hormonal intake on risk of hepatocellular carcinoma in the United States. *J Clin Oncol* 2015;**33**(15 Suppl. 1).
- Brand JS, van der Schouw YT, Onland-Moret NC, Sharp SJ, Ong KK, Khaw KT, Ardanaz E, Amiano P, Boeing H, Chirlaque MD et al. Age at menopause, reproductive life span, and type 2 diabetes risk: results from the EPIC-InterAct study. *Diabetes Care* 2013;**36**:1012–1019.
- Canonico M, Plu-Bureau G, O'Sullivan MJ, Stefanick ML, Cochrane B, Scarabin PY, Manson JE. Age at menopause, reproductive history, and venous thromboembolism risk among postmenopausal women: the Women's Health Initiative Hormone Therapy clinical trials. *Menopause* 2014;**21**:214–220.
- Chlebowski RT, Anderson GL, Sarto GE, Haque R, Runowicz CD, Aragaki AK, Thomson CA, Howard BV, Wactawski-Wende J, Chen C et al. Continuous combined estrogen plus progestin and endometrial cancer: the women's health initiative randomized trial. *J Natl Cancer Inst* 2016;**108**.
- Chlebowski RT, Rohan TE, Manson JE, Aragaki AK, Kaunitz A, Stefanick ML, Simon MS, Johnson KC, Wactawski-Wende J, O'Sullivan MJ et al. Breast cancer after use of estrogen plus progestin and estrogen alone: analyses of data from 2 women's health initiative randomized clinical trials. *JAMA Oncol* 2015;**1**:296–305.
- Coppus AM, Evenhuis HM, Verberne GJ, Visser FE, Eikelenboom P, van Gool WA, Janssens AC, van Duijn CM. Early age at menopause is associated with increased risk of dementia and mortality in women with Down syndrome. *J Alzheimers Dis* 2010;**19**:545–550.
- Deardorff J, Abrams B, Ekwaru JP, Rehkopf DH. Socioeconomic status and age at menarche: an examination of multiple indicators in an ethnically diverse cohort. *Ann Epidemiol* 2014;**24**:727–733.
- Desquilbet L, Mariotti F. Dose-response analyses using restricted cubic spline functions in public health research. *Stat Med* 2010;**29**:1037–1057.
- Ebong IA, Watson KE, Goff DC Jr., Bluemke DA, Srikanthan P, Horwich T, Bertoni AG. Age at menopause and incident heart failure: the multi-ethnic study of atherosclerosis. *Menopause* 2014;**21**:585–591.
- Fan Y, Mao R, Yang J. NF-kappaB and STAT3 signaling pathways collaboratively link inflammation to cancer. *Protein Cell* 2013;**4**:176–185.
- Fernandez E, Gallus S, Bosetti C, Franceschi S, Negri E, La Vecchia C. Hormone replacement therapy and cancer risk: a systematic analysis from a network of case-control studies. *Int J Cancer* 2003;**105**:408–412.
- Fwu CW, Chien YC, Kirk GD, Nelson KE, You SL, Kuo HS, Feinleib M, Chen CJ. Hepatitis B virus infection and hepatocellular carcinoma among parous Taiwanese women: nationwide cohort study. *J Natl Cancer Inst* 2009;**101**:1019–1027.
- Georgakis MK, Thomopoulos TP, Diamantaras AA, Kalogirou EI, Skalkidou A, Daskalopoulou SS, Petridou ET. Association of age at menopause and duration of reproductive period with depression after menopause: a systematic review and meta-analysis. *JAMA Psychiatry* 2016;**73**:139–149.
- Ghebranious N, Sell S. Hepatitis B injury, male gender, aflatoxin, and p53 expression each contribute to hepatocarcinogenesis in transgenic mice. *Hepatology* 1998;**27**:383–391.
- Gong TT, Wang YL, Ma XX. Age at menarche and endometrial cancer risk: a dose-response meta-analysis of prospective studies. *Sci Rep* 2015;**5**:14051.
- Gong TT, Wu QJ, Vogtmann E, Lin B, Wang YL. Age at menarche and risk of ovarian cancer: a meta-analysis of epidemiological studies. *Int J Cancer* 2013;**132**:2894–2900.
- Greiser CM, Greiser EM, Doren M. Menopausal hormone therapy and risk of breast cancer: a meta-analysis of epidemiological studies and randomized controlled trials. *Hum Reprod Update* 2005;**11**:561–573.
- Greiser CM, Greiser EM, Doren M. Menopausal hormone therapy and risk of ovarian cancer: systematic review and meta-analysis. *Hum Reprod Update* 2007;**13**:453–463.
- Greiser CM, Greiser EM, Doren M. Menopausal hormone therapy and risk of lung cancer—systematic review and meta-analysis. *Maturitas* 2010;**65**:198–204.
- Hamling J, Lee P, Weitkunat R, Ambuhl M. Facilitating meta-analyses by deriving relative effect and precision estimates for alternative comparisons from a set of estimates presented by exposure level or disease category. *Stat Med* 2008;**27**:954–970.
- Hartemink N, Boshuizen HC, Nagelkerke NJ, Jacobs MA, van Houwelingen HC. Combining risk estimates from observational studies with different exposure cut-points: a meta-analysis on body mass index and diabetes type 2. *Am J Epidemiol* 2006;**163**:1042–1052.
- Ha J, Yan M, Aguilar M, Bhuket T, Tana MM, Liu B, Gish RG, Wong RJ. Race/ethnicity-specific disparities in cancer incidence, burden of disease, and overall survival among patients with hepatocellular carcinoma in the United States. *Cancer* 2016;**122**:2512–2523.
- Haddaway NR, Collins AM, Coughlin D, Kirk S. The role of Google scholar in evidence reviews and its applicability to grey literature searching. *PLoS One* 2015;**10**:e0138237.
- Hartwell HJ, Petrosky KY, Fox JG, Horseman ND, Rogers AB. Prolactin prevents hepatocellular carcinoma by restricting innate immune activation of c-Myc in mice. *Proc Natl Acad Sci USA* 2014;**111**:11455–11460.
- Hayashida K, Shoji I, Deng L, Jiang DP, Ide YH, Hotta H. 17beta-estradiol inhibits the production of infectious particles of hepatitis C virus. *Microbiol Immunol* 2010;**54**:684–690.
- Higgins JP, Thompson SG, Deeks JJ, Altman DG. Measuring inconsistency in meta-analyses. *Br Med J* 2003;**327**:557–560.
- Hsing AW, McLaughlin JK, Hoover RN, Co Chien HT, Blot WJ, Fraumeni JF Jr. Parity and primary liver cancer among young women. *J Natl Cancer Inst* 1992;**84**:1118–1119.
- Ikeda K, Arase Y, Kobayashi M, Saitoh S, Someya T, Hosaka T, Suzuki Y, Suzuki F, Tsubota A, Akuta N et al. Significance of multicentric cancer recurrence after potentially curative ablation of hepatocellular carcinoma: a longterm cohort study of 892 patients with viral cirrhosis. *J Gastroenterol* 2003;**38**:865–876.
- Jaspers L, Daan NM, van Dijk GM, Gazibara T, Muka T, Wen KX, Meun C, Zillikens MC, Roeters van Lennep JE, Roos-Hesselink JW et al. Health in middle-aged and elderly women: a conceptual framework for healthy menopause. *Maturitas* 2015;**81**:93–98.
- Joffe H, Bromberger JT. Shifting paradigms about hormonal risk factors for postmenopausal depression: age at menopause as an indicator of cumulative lifetime exposure to female reproductive hormones. *JAMA Psychiatry* 2016;**73**:1111–112.
- Jungheim ES, Colditz GA. Short-term use of unopposed estrogen: a balance of inferred risks and benefits. *JAMA* 2011;**305**:1354–1355.
- Kanazir M, Boricic I, Delic D, Tepavcevic DK, Knezevic A, Jovanovic T, Pekmezovic T. Risk factors for hepatocellular carcinoma: a case-control study in Belgrade (Serbia). *Tumori* 2010;**96**:911–917.
- Krieger N, Kiang MV, Kosheleva A, Waterman PD, Chen JT, Beckfield J. Age at menarche: 50-year socioeconomic trends among US-born black and white women. *Am J Public Health* 2015;**105**:388–397.
- La Vecchia C, Negri E, Franceschi S, D'Avanzo B. Reproductive factors and the risk of hepatocellular carcinoma in women. *Int J Cancer* 1992;**52**:351–354.
- LaCroix AZ, Chlebowski RT, Manson JE, Aragaki AK, Johnson KC, Martin L, Margolis KL, Stefanick ML, Brzyski R, Curb JD et al. Health outcomes after stopping conjugated equine estrogens among postmenopausal women with prior hysterectomy: a randomized controlled trial. *JAMA* 2011;**305**:1305–1314.
- Lambe M, Trichopoulos D, Hsieh CC, Ekblom A, Pavia M. Parity and hepatocellular carcinoma. A population-based study in Sweden. *Int J Cancer* 1993;**55**:745–747.
- Lawlor DA, Ebrahim S, Smith GD. The association of socio-economic position across the life course and age at menopause: the British women's heart and health study. *BJOG* 2003;**110**:1078–1087.
- Li CL, Yeh KH, Liu WH, Chen CL, Chen DS, Chen PJ, Yeh SH. Elevated p53 promotes the processing of miR-18a to decrease estrogen receptor-alpha in female hepatocellular carcinoma. *Int J Cancer* 2015;**136**:761–770.
- Li Z, Tuteja G, Schug J, Kaestner KH. Foxa1 and Foxa2 are essential for sexual dimorphism in liver cancer. *Cell* 2012;**148**:72–83.
- Lin KJ, Cheung WY, Lai JY, Giovannucci EL. The effect of estrogen vs. combined estrogen-progestogen therapy on the risk of colorectal cancer. *Int J Cancer* 2012;**130**:419–430.
- Liu WC, Liu QY. Molecular mechanisms of gender disparity in hepatitis B virus-associated hepatocellular carcinoma. *World J Gastroenterol* 2014;**20**:6252–6261.

- Liu WH, Yeh SH, Lu CC, Yu SL, Chen HY, Lin CY, Chen DS, Chen PJ. MicroRNA-18a prevents estrogen receptor- $\alpha$  expression, promoting proliferation of hepatocellular carcinoma cells. *Gastroenterology* 2009;**136**:683–693.
- Maeda S, Kamata H, Luo JL, Leffert H, Karin M. IKK $\beta$  couples hepatocyte death to cytokine-driven compensatory proliferation that promotes chemical hepatocarcinogenesis. *Cell* 2005;**121**:977–990.
- Mantovani A, Allavena P, Sica A, Balkwill F. Cancer-related inflammation. *Nature* 2008;**454**:436–444.
- Matsuo K, Gualtieri MR, Cahoon SS, Jung CE, Paulson RJ, Shoupe D, Muderspach LI, Wakatsuki A, Wright JD, Roman LD. Surgical menopause and increased risk of nonalcoholic fatty liver disease in endometrial cancer. *Menopause* 2016;**23**:189–196.
- McGlynn KA, Hagberg K, Chen J, Braunlin M, Graubard BI, Sunaya N, Jick S, Sahasrabudhe VV. Menopausal hormone therapy use and risk of primary liver cancer in the clinical practice research datalink. *Int J Cancer* 2016;**138**:2146–2153.
- McGlynn KA, London WT. The global epidemiology of hepatocellular carcinoma: present and future. *Clin Liver Dis* 2011;**15**:223–243, vii–x.
- McGlynn KA, Sahasrabudhe VV, Campbell PT, Graubard BI, Chen J, Schwartz LM, Petrick JL, Alavanja MC, Andreotti G, Boggs DA et al. Reproductive factors, exogenous hormone use and risk of hepatocellular carcinoma among US women: results from the liver cancer pooling project. *Br J Cancer* 2015;**112**:1266–1272.
- Meschia M, Pansini F, Modena AB, de Aloysio D, Gambacciani M, Parazzini F, Campagnoli C, Maiocchi G, Peruzzi E. Determinants of age at menopause in Italy: results from a large cross-sectional study. ICARUS Study Group. Italian Climacteric Research Group Study. *Maturitas* 2000;**34**:119–125.
- Montella M, D'Arena G, Crispo A, Capunzo M, Nocerino F, Grimaldi M, Barbieri A, D'Ursi AM, Tecce MF, Amore A et al. Role of sex hormones in the development and progression of hepatitis B virus-associated hepatocellular carcinoma. *Int J Endocrinol* 2015;**2015**:854530.
- Mucci LA, Kuper HE, Tamimi R, Lagiou P, Spanos E, Trichopoulos D. Age at menarche and age at menopause in relation to hepatocellular carcinoma in women. *BJOG* 2001;**108**:291–294.
- Nagel G, Altenburg HP, Nieters A, Boffetta P, Linseisen J. Reproductive and dietary determinants of the age at menopause in EPIC-Heidelberg. *Maturitas* 2005;**52**:337–347.
- Nakatani T, Roy G, Fujimoto N, Asahara T, Ito A. Sex hormone dependency of diethylnitrosamine-induced liver tumors in mice and chemoprevention by leuprorelin. *Jpn J Cancer Res* 2001;**92**:249–256.
- Naugler WE, Sakurai T, Kim S, Maeda S, Kim K, Elsharkawy AM, Karin M. Gender disparity in liver cancer due to sex differences in MyD88-dependent IL-6 production. *Science* 2007;**317**:121–124.
- Nnoaham KE, Webster P, Kumbang J, Kennedy SH, Zondervan KT. Is early age at menarche a risk factor for endometriosis? A systematic review and meta-analysis of case-control studies. *Fertil Steril* 2012;**98**:702–712 e706.
- Nuesch E, Trelle S, Reichenbach S, Rutjes AVW, Tschannen B, Altman DG, Egger M, Juni P. Small study effects in meta-analyses of osteoarthritis trials: meta-epidemiological study. *Br Med J* 2010;**341**:c3515.
- Orsini N, Bellocco R, Greenland S. Generalized least squares for trend estimation of summarized dose–response data. *Stata J* 2006;**6**:40–57.
- Orsini N, Li R, Wolk A, Khudyakov P, Spiegelman D. Meta-analysis for linear and nonlinear dose-response relations: examples, an evaluation of approximations, and software. *Am J Epidemiol* 2012;**175**:66–73.
- Pan H, He Z, Ling L, Ding Q, Chen L, Zha X, Zhou W, Liu X, Wang S. Reproductive factors and breast cancer risk among BRCA1 or BRCA2 mutation carriers: results from ten studies. *Cancer Epidemiol* 2014;**38**:1–8.
- Pearce CL, Chung K, Pike MC, Wu AH. Increased ovarian cancer risk associated with menopausal estrogen therapy is reduced by adding a progestin. *Cancer* 2009;**115**:531–539.
- Persson I, Yuen J, Bergkvist L, Schairer C. Cancer incidence and mortality in women receiving estrogen and estrogen-progestin replacement therapy—long-term follow-up of a Swedish cohort. *Int J Cancer* 1996;**67**:327–332.
- Sakurai T, He G, Matsuzawa A, Yu GY, Maeda S, Hardiman G, Karin M. Hepatocyte necrosis induced by oxidative stress and IL-1  $\alpha$  release mediate carcinogen-induced compensatory proliferation and liver tumorigenesis. *Cancer Cell* 2008;**14**:156–165.
- Seton-Rogers S. Hepatocellular carcinoma: gender differences. *Nat Rev Cancer* 2014;**14**:578.
- Shebl FM, Capo-Ramos DE, Graubard BI, McGlynn KA, Altekruse SF. Socioeconomic status and hepatocellular carcinoma in the United States. *Cancer Epidemiol Biomarkers Prev* 2012;**21**:1330–1335.
- Shi L, Feng Y, Lin H, Ma R, Cai X. Role of estrogen in hepatocellular carcinoma: is inflammation the key? *J Transl Med* 2014;**12**:93.
- Shobeiri F, Nazari M. Age at menopause and its main predictors among Iranian women. *Int J Fertil Steril* 2014;**8**:267–272.
- Siegel RL, Miller KD, Jemal A. Cancer statistics, 2016. *CA Cancer J Clin* 2016;**66**:7–30.
- Song Y, Ma J, Wang HJ, Wang Z, Hu P, Zhang B, Agardh A. Trends of age at menarche and association with body mass index in Chinese school-aged girls, 1985–2010. *J Pediatr* 2014;**165**:1172–1177 e1171.
- Stanford JL, Thomas DB. Reproductive factors in the etiology of hepatocellular carcinoma. The WHO Collaborative Study of Neoplasia and Steroid Contraceptives. *Cancer Causes Control* 1992;**3**:37–42.
- Sterne JA, Egger M, Smith GD. Systematic reviews in health care: investigating and dealing with publication and other biases in meta-analysis. *Br Med J* 2001;**323**:101–105.
- Tavani A, Negri E, Parazzini F, Franceschi S, La Vecchia C. Female hormone utilization and risk of hepatocellular carcinoma. *Br J Cancer* 1993;**67**:635–637.
- Wands J. Hepatocellular carcinoma and sex. *N Engl J Med* 2007;**357**:1974–1976.
- Yang D, Hanna DL, Usher J, LoCoco J, Chaudhari P, Lenz HJ, Setiawan VW, El-Khoueiry A. Impact of sex on the survival of patients with hepatocellular carcinoma: a surveillance, epidemiology, and end results analysis. *Cancer* 2014;**120**:3707–3716.
- Wang BJ, Zhang B, Yan SS, Li ZC, Jiang T, Hua CJ, Lu L, Liu XZ, Zhang DH, Zhang RS et al. Hormonal and reproductive factors and risk of esophageal cancer in women: a meta-analysis. *Dis Esophagus* 2016;**29**:448–4.
- Wang SH, Yeh SH, Lin WH, Yeh KH, Yuan Q, Xia NS, Chen DS, Chen PJ. Estrogen receptor  $\alpha$  represses transcription of HBV genes via interaction with hepatocyte nuclear factor 4 $\alpha$ . *Gastroenterology* 2012;**142**:989–998 e984.
- Yager JD, Jr., Yager R. Oral contraceptive steroids as promoters of hepatocarcinogenesis in female Sprague-Dawley rats. *Cancer Res* 1980;**40**:3680–3685.
- Yamamoto R, Iishi H, Tatsuta M, Yamamoto T, Koike K, Kanda Y, Miyake A, Tsuji M, Terada N. Correlation between serum prolactin levels and hepatocellular tumorigenesis induced by 3'-methyl-4-dimethylaminoazobenzene in mice. *Br J Cancer* 1995;**72**:17–21.
- Yeh YT, Chang CW, Wei RJ, Wang SN. Progesterone and related compounds in hepatocellular carcinoma: basic and clinical aspects. *Biomed Res Int* 2013;**2013**:290575.
- Yu MC, Tong MJ, Govindarajan S, Henderson BE. Nonviral risk factors for hepatocellular carcinoma in a low-risk population, the non-Asians of Los Angeles County, California. *J Natl Cancer Inst* 1991;**83**:1820–1826.
- Yu MW, Chang HC, Chang SC, Liaw YF, Lin SM, Liu CJ, Lee SD, Lin CL, Chen PJ, Lin SC et al. Role of reproductive factors in hepatocellular carcinoma: impact on hepatitis B- and C-related risk. *Hepatology* 2003;**38**:1393–1400.
- Zeng H, Zheng R, Guo Y, Zhang S, Zou X, Wang N, Zhang L, Tang J, Chen J, Wei K et al. Cancer survival in China, 2003–2005: a population-based study. *Int J Cancer* 2015;**136**:1921–1930.
- Zhang K, Chow PK. The effect of megestrol acetate on growth of HepG2 cells in vitro and in vivo. *Clinical. Cancer Res* 2004;**10**:5226–5232.
- Zimmermann E, Berentzen TL, Gamborg M, Sorensen TI, Baker JL. Sex-specific associations between birth weight and adult primary liver cancer in a large cohort of Danish children. *Int J Cancer* 2016;**138**:1410–1415.
- Zoller H, Tilg H. Nonalcoholic fatty liver disease and hepatocellular carcinoma. *Metabolism* 2016;**65**:1151–1160.
